# Supplementary material for: Epithelial Cell Adhesion Molecule in Primary Sjögren’s Syndrome Patients: Characterization and Evaluation of a Potential Biomarker
Source: Hindawi journal article supplement (doi:10.1155/2019/3269475), 2019-12-05
Supplement: f1 [file 3269475.f1.pdf]

## Supplemental Table

**Table SI. Histopathologic grade of the study participants.**

|                          | non-SS<br>controls | pSS patients at<br>early stage | P-value | pSS patients at<br>advanced stage | P-value | pSS patients<br>included in study | P-value |
|--------------------------|--------------------|--------------------------------|---------|-----------------------------------|---------|-----------------------------------|---------|
| Histopathologic<br>grade | G0,20(100%)        | G0,0(0%)                       |         | G0,0(0%)                          |         | G0,0(0%)                          |         |
|                          | G1-2,0(0%)         | G1-2,16(100%)                  | <0.001  | G1-2,0(0%)                        | <0.001  | G1-2,16(34.0%),                   | <0.001  |
|                          | G3-4,0(0%)         | G3-4,0(0%)                     |         | G3-4,31(100%)                     |         | G3-4,31(66.0%)                    |         |

**Table SII. Risk factors analysis for pSS patients.**

|                   | pSS patients |              |                |
|-------------------|--------------|--------------|----------------|
| factors           | OR           | P-value      | 95%CI          |
| Membranous EpEX   | 10.587       | <b>0.009</b> | 1.797-62.382   |
| Membranous EpICD  | 61.972       | 0.058        | 0.870-4416.473 |
| Cytoplasmic EpICD | 0.019        | 0.093        | 0.000-1.944    |
| Nuclear EpICD     | 3.659        | 0.301        | 0.313-42.743   |
| Female            | 0.408        | 0.520        | 0.027-6.244    |
| Xerostomia        | 0.469        | 0.589        | 0.030-7.335    |
| Saprodontia       | 5.354        | 0.171        | 0.485-59.043   |

|            |       |       |              |
|------------|-------|-------|--------------|
| Anti-SSA   | 0.784 | 0.684 | 0.277-0.222  |
| ANA        | 0.437 | 0.337 | 0.022-5.236  |
| ANA and RF | 1.304 | 0.837 | 0.104-16.394 |
| Anti-Ro52  | 1.195 | 0.867 | 0.150-9.531  |

**Table SIII. Risk factors analysis for pSS patients at early stage.**

| <b>pSS patients at early stage</b> |           |                |               |
|------------------------------------|-----------|----------------|---------------|
| <b>factors</b>                     | <b>OR</b> | <b>P-value</b> | <b>95%CI</b>  |
| Membranous EpEX                    | 6.115     | <b>0.033</b>   | 1.154-32.414  |
| Membranous EpICD                   | 0.139     | 0.287          | 0.004-5.260   |
| Cytoplasmic EpICD                  | 5.815     | 0.272          | 0.252-134.223 |
| Female                             | 1.371     | 0.793          | 0.130-14.463  |
| Saprodontia                        | 9.028     | 0.058          | 0.928-87.849  |
| Anti-SSA                           | 0.761     | 0.522          | 0.330-1.754   |
